# Supplementary material for: Evolution of Barrett’s esophagus through space and time at single-crypt and whole-biopsy levels
Source: PubMed Central journal article supplement (PMC5824808; doi:10.1038/s41467-017-02621-x), 2018-02-23
Supplement: 41467_2017_2621_MOESM3_ESM.pdf [file 41467_2017_2621_MOESM3_ESM.pdf]

## Description of Supplementary Files

File Name: Supplementary Data 1

Description: **Segments removed after manual inspection.** Chr: chromosome; nLogR: number of logR-informative probes; nBAF: number of BAF-informative probes.
